# Supplementary material for: Pervasive Divergence of Transcriptional Gene Regulation in Caenorhabditis Nematodes
Source: PLOS journal article supplement (doi:10.1371/journal.pgen.1004435), 2014-06-26
Supplement: S2 (10.1371/journal.pgen.1004435.s002) [file journal.pgen.1004435.s002.pdf › journal.pgen.1004435.s002.pdf]

| <b>A</b><br><i>unc-46</i> |                                                                                  | RMEs | AVL | SIADs | RIS | D-type<br>(median) | DVB | Lat.<br>gang. | PDB |
|---------------------------|----------------------------------------------------------------------------------|------|-----|-------|-----|--------------------|-----|---------------|-----|
| in Cel                    | 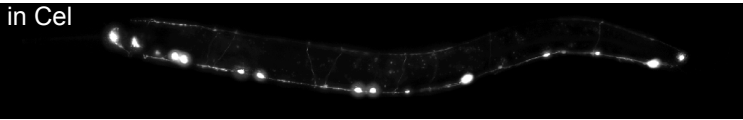 | 100% | 88% | 96%   | 90% | 18                 | 86% | 34%           |     |
| in Cbr                    |  | 97%  | 75% | 96%   | 28% | 18.5               | 85% |               | 72% |

| <b>B</b><br><i>unc-25</i> |                                                                                  | RMEs | AVL           | RIS           | D-type<br>(median) | SIADs |
|---------------------------|----------------------------------------------------------------------------------|------|---------------|---------------|--------------------|-------|
| in Cel                    | 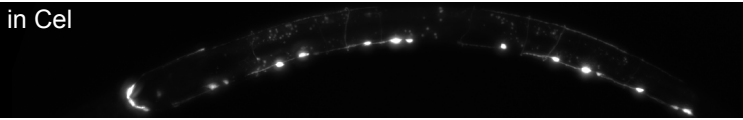 | 100% |               |               | 16                 | 52%   |
| in Cbr                    |  | 100% | 12%<br>(weak) | 41%<br>(weak) | 15                 | 100%  |

| <b>C</b><br><i>gpa-5</i> |                                                                                    | AWAs          | MCs           | M4            | M1            | DVB           | PVNs | PHCs          |
|--------------------------|------------------------------------------------------------------------------------|---------------|---------------|---------------|---------------|---------------|------|---------------|
| in Cel                   | 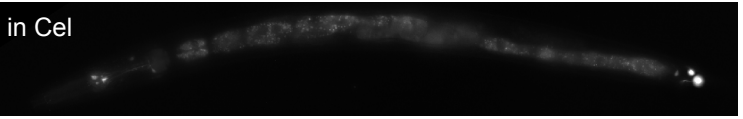 | 45%<br>(weak) | 100%          | 85%           | 85%           | 87%           | 94%  |               |
| in Cbr                   |  | 47%<br>(weak) | 89%<br>(weak) | 21%<br>(weak) | 79%<br>(weak) | 66%<br>(weak) |      | 95%<br>(weak) |

| <b>D</b><br><i>oig-1</i> |                                                                                    | Head<br>neurons | D-type<br>(median) | DVB | PVCs          | HSNs | PDEs |
|--------------------------|------------------------------------------------------------------------------------|-----------------|--------------------|-----|---------------|------|------|
| in Cel                   |  | 100%            | 14                 | 72% | 100%          | 36%  |      |
| in Cbr                   |  | 100%            | 17                 |     | 63%<br>(weak) |      | 29%  |

Figure S2
