# Supplementary material for: Pervasive Divergence of Transcriptional Gene Regulation in Caenorhabditis Nematodes
Source: PLOS journal article supplement (doi:10.1371/journal.pgen.1004435), 2014-06-26
Supplement: S3 (10.1371/journal.pgen.1004435.s003) [file journal.pgen.1004435.s003.pdf › journal.pgen.1004435.s003.pdf]

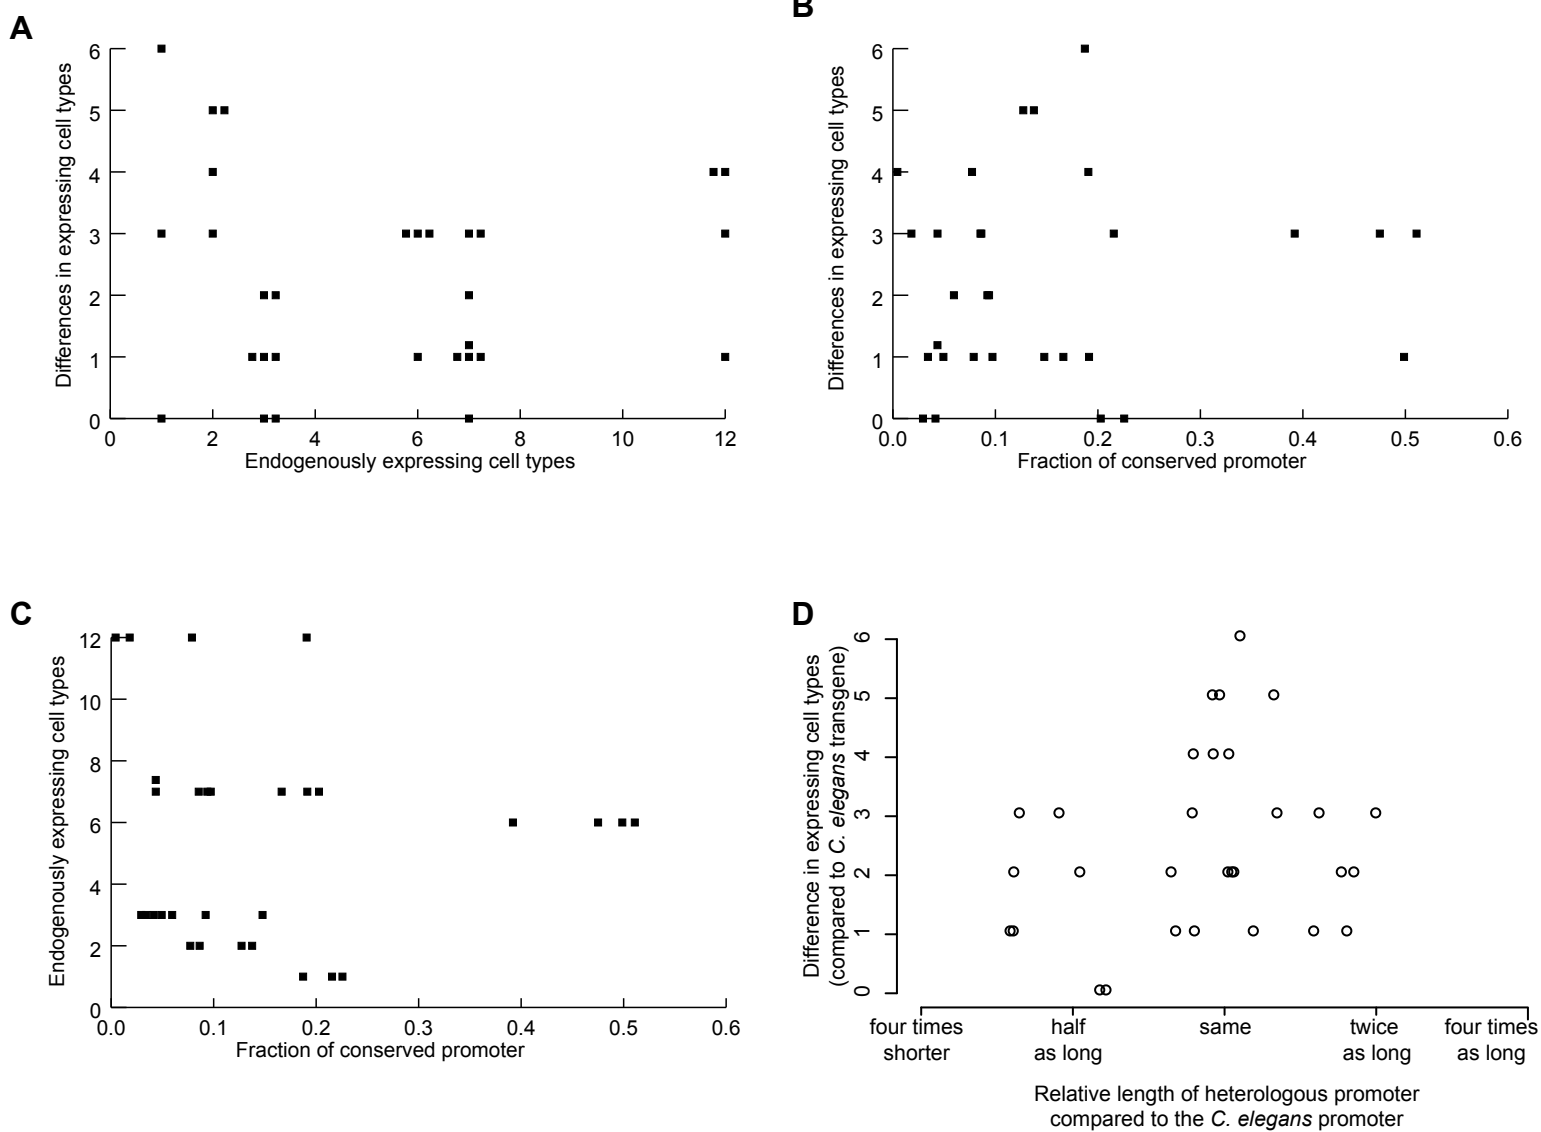

**Figure S3**
