# Supplementary material for: Pervasive Divergence of Transcriptional Gene Regulation in Caenorhabditis Nematodes
Source: PLOS journal article supplement (doi:10.1371/journal.pgen.1004435), 2014-06-26
Supplement: S4 (10.1371/journal.pgen.1004435.s004) [file journal.pgen.1004435.s004.pdf › journal.pgen.1004435.s004.pdf]

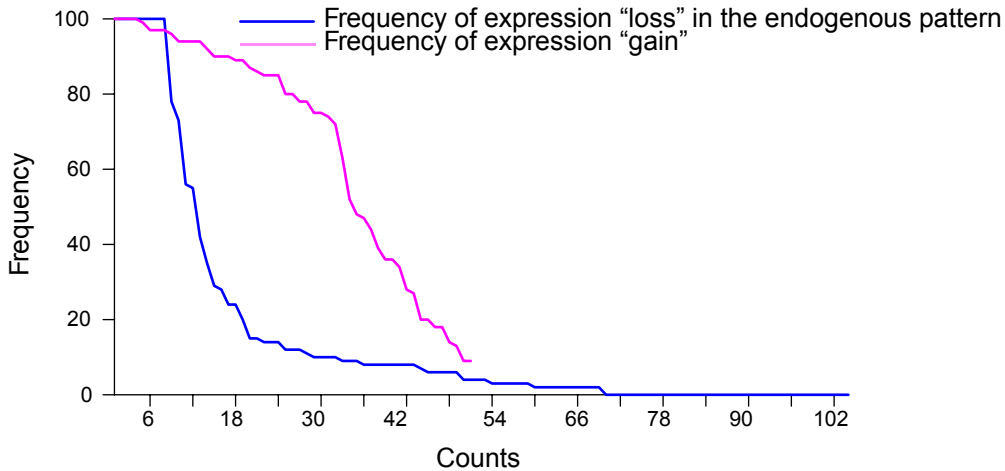

**Figure S4**
